# Supplementary material for: Subsurface oxygen maximum in oligotrophic marine ecosystems: mapping the interaction between physical and biogeochemical processes
Source: Copernicus journal article supplement (doi:10.5194/bg-2022-70), 2022-04-08
Supplement: Supplementary file 1 [file bg-2022-70-supplement.pdf]

## Supplementary Material

### Equations

- Oxygen regulating factor to switch between aerobic and anaerobic conditions for bacterioplankton:

$$f_B^{O_2} = \frac{O_2^3}{O_2^3 + h_B^3} \quad (S1)$$

in which  $h_B^{O_2}$  is the oxygen concentration at which metabolic functionalities are halved.

- Nitrification rate:

$$\left. \frac{dA}{dt} \right|^{nit} = \Lambda_A^{nit} f_n^T \frac{O_2}{O_2 + h_{O_2}} A \quad (S2)$$

in which  $\Lambda_A^{nit}$  is the constant specific nitrification rate,  $h_{O_2}$  the half saturation oxygen concentration and  $f_n^T$  the temperature regulating factor expressed as:

$$f_n^T = Q_{10,n}^{\frac{T-10}{10}} \quad (S3)$$

where  $Q_{10,n}$  is the characteristic coefficient for nitrification.

- Reoxidation rate:

$$\left. \frac{dR_{eq}}{dt} \right|^{reox} = \Lambda_{R_{eq}}^{reox} \frac{O_2}{O_2 + h_{O_2}} R_{eq} \quad (S4)$$

in which  $\Lambda_{R_{eq}}^{reox}$  is the constant specific daily reoxidation rate and  $h_{O_2}$  the half saturation oxygen concentration.

## Tables

| Symbol                 | Units                                                   | Value | Description                                                       |
|------------------------|---------------------------------------------------------|-------|-------------------------------------------------------------------|
| $\Omega_c^{O_2}$       | mmolO <sub>2</sub> mgC <sup>-1</sup>                    | 12    | Stoichiometric coefficient for production and respiration         |
| $\Omega_n^{O_2}$       | mmolO <sub>2</sub> mmolN <sup>-1</sup>                  | 2     | Stoichiometric coefficient for nitrification reaction             |
| $\Omega_r^{O_2}$       | mmolO <sub>2</sub> (mmolHS <sup>-</sup> ) <sup>-1</sup> | 2     | Stoichiometric coefficient for anaerobic reaction                 |
| $h_{O_2}$              | mmolO <sub>2</sub> m <sup>-3</sup>                      | 10    | Half saturation for nitrification and reoxidation                 |
| $h_B^{O_2}$            | mmolO <sub>2</sub> m <sup>-3</sup>                      | 30    | Half saturation constant for oxygen limitation (bacterioplankton) |
| $\Lambda_A^{nit}$      | d <sup>-1</sup>                                         | 0.01  | Specific nitrification rate at 10 °C                              |
| $Q_{10,n}$             | -                                                       | 2.367 | Characteristic Q10 factor for nitrification                       |
| $\Lambda_{Req}^{reox}$ | d <sup>-1</sup>                                         | 0.05  | Specific daily reoxidation rate of reduction equivalents          |

ST1: Model parameters defined in Sect. 2.1.

|     | Emodnet_int                 | BGC-Argo                    | Stations         |                 |                  |
|-----|-----------------------------|-----------------------------|------------------|-----------------|------------------|
|     | No. O <sub>2</sub> profiles | No. O <sub>2</sub> profiles | No. GPP profiles | No. CR profiles | No. NCP profiles |
| alb | 6                           | x                           | x                | x               | x                |
| swm | 34                          | 602                         | 1                | 1               | 2                |
| nwm | 1327                        | 2623                        | (7)              | 8 (7)           | (7)              |
| tyr | 147                         | 587                         | 2                | 2               | 3                |
| adr | 14                          | 179                         | x                | x               | x                |
| aeg | 232                         | x                           | 1                | 1               | 1                |
| ion | 315                         | 897                         | 7                | 7               | 8                |
| lev | 338                         | 949                         | 4                | 4               | 4                |

ST2: Number of profiles of O<sub>2</sub> and GPP, CR and NCP used in the validation procedure (with references for the observations indicated in the text). The time periods for the observations are: 1999-2016 for Emodnet\_int and 2013-2019 for BGC-Argo float oxygen concentration (first and second column, respectively); 1999-2000, 2002-2003, 2006-2008, 2017 for planktonic metabolism observations (last three columns, where parentheses indicate coastal data).

## Figures

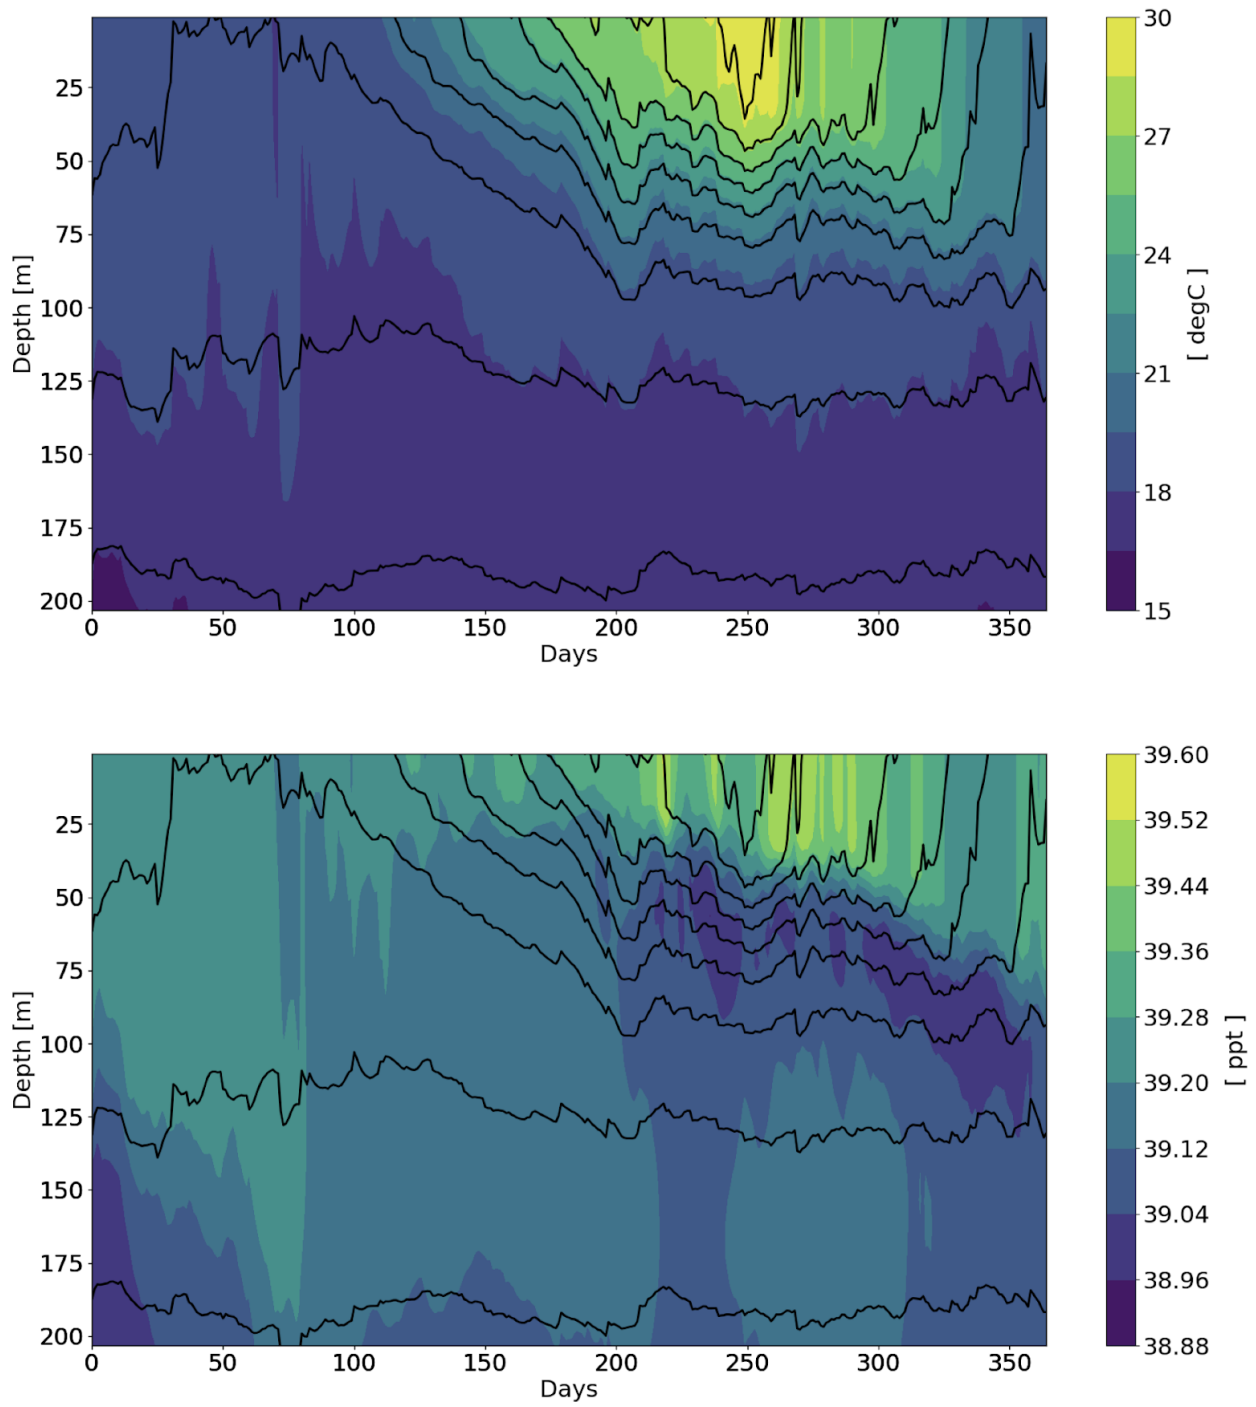

**Figure S1: Hovmöller plot of model-derived temperature (top) and salinity (down), with density contours (in black) in E area (Fig. 7) in 2014.**

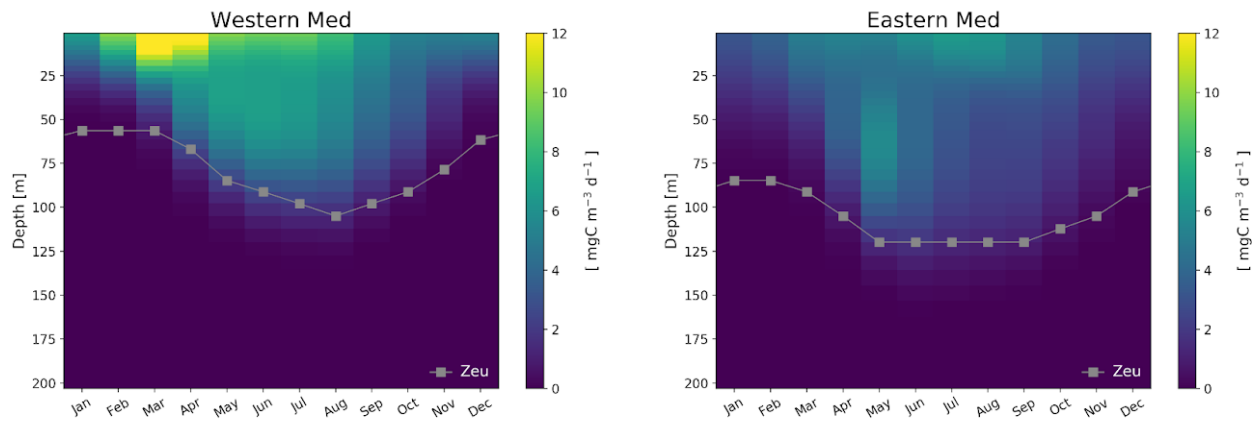

**Figure S2: Hovmöller plot of net community production in western (left) and eastern Mediterranean (right) in 1999-2019 reanalysis simulation. Gray squares represent the euphotic depth (Zeu), i.e. the depth at which the modelled PAR is 1% of its surface value.**

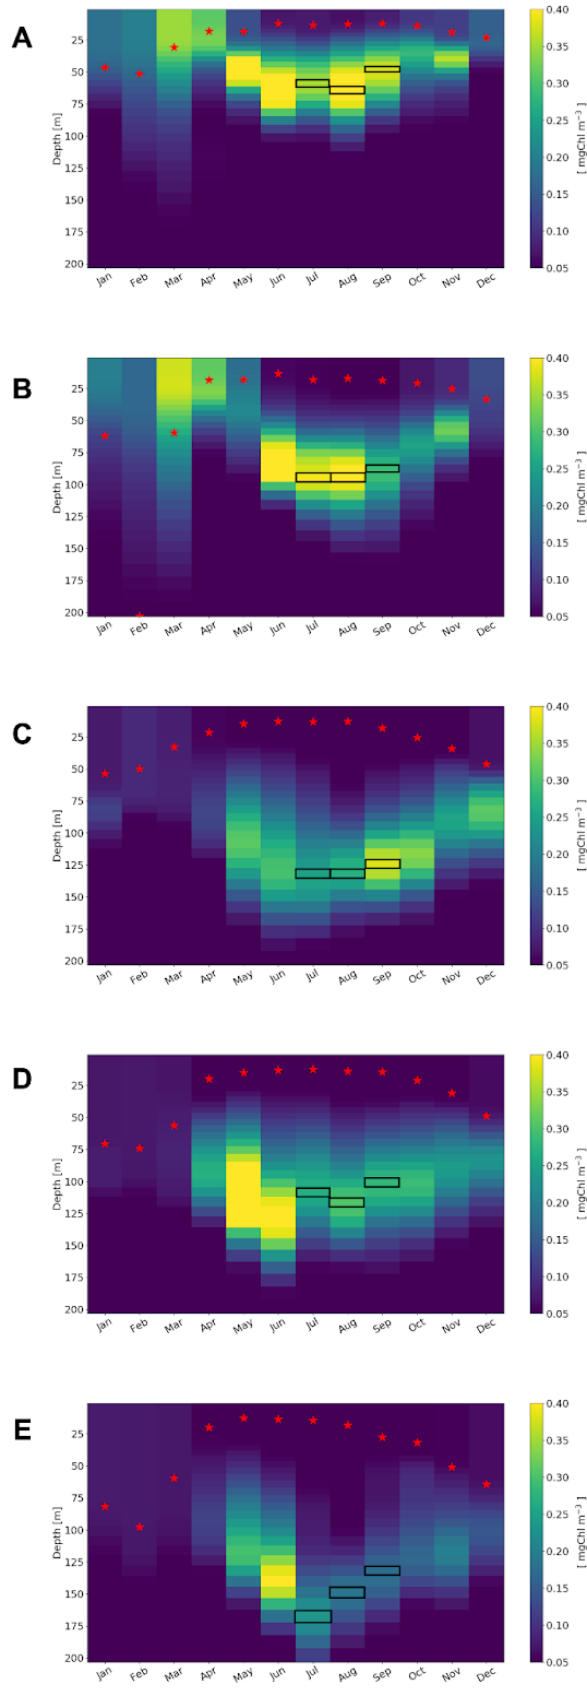

**Figure S3: Hovmöller plot of mean model-derived monthly chlorophyll concentration in the Mediterranean sites indicated in Fig. 7 in 2014. Red asterisks represent the mixed layer depth, black rectangles the maximum value along the vertical direction in the summer period (JAS months).**
